# Supplementary material for: Genome-Wide Identification of KANADI1 Target Genes
Source: PLoS One. 2013 Oct 14;8(10):e77341. doi: 10.1371/journal.pone.0077341 (PMC3796457; doi:10.1371/journal.pone.0077341)
Supplement: Dataset S7 — Overlap ChIP-Seq/tiling array. (XLS) [file pone.0077341.s007.xls]

## Sheet: Sheet1
AT1G01120.1	| Symbols: KCS1 | 3-ketoacyl-CoA synthase 1 | chr1:57269-59167 REVERSE LENGTH=1899
AT1G01140.3	| Symbols: CIPK9, PKS6 | CBL-interacting protein kinase 9 | chr1:64167-67625 REVERSE LENGTH=1700
AT1G01490.1	| Symbols: | Heavy metal transport/detoxification superfamily protein | chr1:180120-182358 REVERSE LENGTH=1107
AT1G02610.1	| Symbols: | RING/FYVE/PHD zinc finger superfamily protein | chr1:553050-555994 REVERSE LENGTH=937
AT1G02620.1	| Symbols: | Ras-related small GTP-binding family protein | chr1:557092-557986 FORWARD LENGTH=687
AT1G02890.1	| Symbols: | AAA-type ATPase family protein | chr1:645092-651907 REVERSE LENGTH=4131
AT1G03870.1	| Symbols: FLA9 | FASCICLIN-like arabinoogalactan 9 | chr1:982506-983540 REVERSE LENGTH=1035
AT1G07530.1	| Symbols: SCL14, ATGRAS2, GRAS2 | SCARECROW-like 14 | chr1:2313582-2316469 REVERSE LENGTH=2787
AT1G07640.3	| Symbols: OBP2 | Dof-type zinc finger DNA-binding family protein | chr1:2354354-2356227 REVERSE LENGTH=1588
AT1G09570.1	| Symbols: PHYA, FHY2, FRE1, HY8 | phytochrome A | chr1:3095256-3100357 REVERSE LENGTH=3829
AT1G10150.1	| Symbols: | Carbohydrate-binding protein | chr1:3325824-3327614 FORWARD LENGTH=1791
AT1G10550.1	| Symbols: XTH33, XET | xyloglucan:xyloglucosyl transferase 33 | chr1:3479153-3480988 REVERSE LENGTH=1068
AT1G11330.2	| Symbols: | S-locus lectin protein kinase family protein | chr1:3810093-3813558 FORWARD LENGTH=2950
AT1G13245.1	| Symbols: RTFL17, DVL4 | ROTUNDIFOLIA like 17 | chr1:4525486-4526064 REVERSE LENGTH=579
AT1G13260.1	| Symbols: RAV1, EDF4 | related to ABI3/VP1 1 | chr1:4542168-4543742 FORWARD LENGTH=1575
AT1G14740.1	| Symbols: | Protein of unknown function (DUF1423) | chr1:5075213-5077791 REVERSE LENGTH=2498
AT1G15690.1	| Symbols: AVP1, ATAVP3, AVP-3, AtVHP1;1 | Inorganic H pyrophosphatase family protein | chr1:5398990-5402519 FORWARD LENGTH=2772
AT1G19840.1	| Symbols: | SAUR-like auxin-responsive protein family | chr1:6872794-6873255 REVERSE LENGTH=462
AT1G20620.1	| Symbols: CAT3, SEN2, ATCAT3 | catalase 3 | chr1:7143067-7146540 FORWARD LENGTH=1901
AT1G21590.1	| Symbols: | Protein kinase protein with adenine nucleotide alpha hydrolases-like domain | chr1:7566232-7569902 REVERSE LENGTH=2860
AT1G21910.1	| Symbols: DREB26 | Integrase-type DNA-binding superfamily protein | chr1:7696536-7697699 FORWARD LENGTH=1164
AT1G22570.1	| Symbols: | Major facilitator superfamily protein | chr1:7976620-7978573 REVERSE LENGTH=1698
AT1G22710.1	| Symbols: SUC2, SUT1, ATSUC2 | sucrose-proton symporter 2 | chr1:8030641-8033117 REVERSE LENGTH=1956
AT1G25550.1	| Symbols: | myb-like transcription factor family protein | chr1:8976434-8978093 FORWARD LENGTH=1396
AT1G25560.1	| Symbols: TEM1, EDF1 | AP2/B3 transcription factor family protein | chr1:8981677-8983041 REVERSE LENGTH=1365
AT1G26208.1	| Symbols: | other RNA | chr1:9066636-9068432 REVERSE LENGTH=1499
AT1G27320.1	| Symbols: AHK3, HK3 | histidine kinase 3 | chr1:9487780-9492572 FORWARD LENGTH=3562
AT1G28310.2	| Symbols: | Dof-type zinc finger DNA-binding family protein | chr1:9911898-9913698 REVERSE LENGTH=1627
AT1G31650.1	| Symbols: ATROPGEF14, ROPGEF14 | RHO guanyl-nucleotide exchange factor 14 | chr1:11326301-11330738 REVERSE LENGTH=2255
AT1G32530.1	| Symbols: | RING/U-box superfamily protein | chr1:11759459-11762607 REVERSE LENGTH=2424
AT1G33780.1	| Symbols: | Protein of unknown function (DUF179) | chr1:12244585-12246188 REVERSE LENGTH=1346
AT1G36060.1	| Symbols: | Integrase-type DNA-binding superfamily protein | chr1:13454496-13456331 REVERSE LENGTH=1836
AT1G49130.1	| Symbols: | B-box type zinc finger protein with CCT domain | chr1:18174740-18175964 REVERSE LENGTH=1010
AT1G50600.1	| Symbols: SCL5 | scarecrow-like 5 | chr1:18737132-18739547 REVERSE LENGTH=2060
AT1G51940.1	| Symbols: | protein kinase family protein / peptidoglycan-binding LysM domain-containing protein | chr1:19295904-19299118 REVERSE LENGTH=2321
AT1G56010.2	| Symbols: NAC1, ANAC022 | NAC domain containing protein 1 | chr1:20946571-20949281 REVERSE LENGTH=1393
AT1G61660.1	| Symbols: | basic helix-loop-helix (bHLH) DNA-binding superfamily protein | chr1:22753715-22756295 REVERSE LENGTH=1594
AT1G62380.1	| Symbols: ACO2, ATACO2 | ACC oxidase 2 | chr1:23082170-23084253 FORWARD LENGTH=1318
AT1G62422.1	| Symbols: | unknown protein; EXPRESSED IN: 22 plant structures; EXPRESSED DURING: 13 growth stages; BEST Arabidopsis thaliana protein match is: unknown protein (TAIR:AT1G12020.1); Has 87 Blast hits to 86 proteins in 14 species: Archae - 0; Bacteria - 0; Metazoa - 0; Fungi - 0; Plants - 87; Viruses - 0; Other Eukaryotes - 0 (source: NCBI BLink). | chr1:23100139-23101033 REVERSE LENGTH=895
AT1G63010.5	| Symbols: | Major Facilitator Superfamily with SPX (SYG1/Pho81/XPR1) domain-containing protein | chr1:23347561-23352697 REVERSE LENGTH=2934
AT1G66140.1	| Symbols: ZFP4 | zinc finger protein 4 | chr1:24619837-24622004 REVERSE LENGTH=1250
AT1G66180.1	| Symbols: | Eukaryotic aspartyl protease family protein | chr1:24647188-24648813 FORWARD LENGTH=1626
AT1G66783.1	| Symbols: MIR157A | MIR157A; miRNA | chr1:24913206-24913296 REVERSE LENGTH=91
AT1G67040.1	| Symbols: | unknown protein; FUNCTIONS IN: molecular_function unknown; INVOLVED IN: biological_process unknown; LOCATED IN: cellular_component unknown; EXPRESSED IN: 20 plant structures; EXPRESSED DURING: 11 growth stages; BEST Arabidopsis thaliana protein match is: unknown protein (TAIR:AT5G26910.3); Has 89 Blast hits to 84 proteins in 15 species: Archae - 0; Bacteria - 0; Metazoa - 5; Fungi - …
AT1G67050.1	| Symbols: | unknown protein; BEST Arabidopsis thaliana protein match is: unknown protein (TAIR:AT5G38320.1); Has 617 Blast hits to 318 proteins in 80 species: Archae - 0; Bacteria - 16; Metazoa - 141; Fungi - 62; Plants - 128; Viruses - 2; Other Eukaryotes - 268 (source: NCBI BLink). | chr1:25028627-25029788 REVERSE LENGTH=1162
AT1G67710.1	| Symbols: ARR11 | response regulator 11 | chr1:25376751-25379144 REVERSE LENGTH=2048
AT1G68130.1	| Symbols: AtIDD14, IDD14 | indeterminate(ID)-domain 14 | chr1:25532244-25534586 FORWARD LENGTH=1769
AT1G68520.1	| Symbols: | B-box type zinc finger protein with CCT domain | chr1:25709114-25710907 REVERSE LENGTH=1596
AT1G68840.1	| Symbols: RAV2, RAP2.8, TEM2, EDF2, AtRAV2 | related to ABI3/VP1 2 | chr1:25880327-25881736 FORWARD LENGTH=1410
AT1G69160.1	| Symbols: | unknown protein; BEST Arabidopsis thaliana protein match is: unknown protein (TAIR:AT3G13980.1); Has 173 Blast hits to 172 proteins in 54 species: Archae - 0; Bacteria - 0; Metazoa - 25; Fungi - 33; Plants - 84; Viruses - 2; Other Eukaryotes - 29 (source: NCBI BLink). | chr1:26000214-26001588 FORWARD LENGTH=1375
AT1G69760.1	| Symbols: | unknown protein; BEST Arabidopsis thaliana protein match is: unknown protein (TAIR:AT1G26920.1); Has 51 Blast hits to 51 proteins in 15 species: Archae - 0; Bacteria - 2; Metazoa - 2; Fungi - 7; Plants - 29; Viruses - 0; Other Eukaryotes - 11 (source: NCBI BLink). | chr1:26239260-26240708 REVERSE LENGTH=1449
AT1G69850.1	| Symbols: ATNRT1:2, NTL1, NRT1:2 | nitrate transporter 1:2 | chr1:26296676-26300472 REVERSE LENGTH=2092
AT1G70290.1	| Symbols: ATTPS8, TPS8, ATTPSC | trehalose-6-phosphatase synthase S8 | chr1:26471078-26474786 REVERSE LENGTH=3019
AT1G70530.1	| Symbols: CRK3 | cysteine-rich RLK (RECEPTOR-like protein kinase) 3 | chr1:26588750-26591379 REVERSE LENGTH=1941
AT1G70940.1	| Symbols: PIN3, ATPIN3 | Auxin efflux carrier family protein | chr1:26743054-26746395 FORWARD LENGTH=2563
AT1G71880.1	| Symbols: SUC1, ATSUC1 | sucrose-proton symporter 1 | chr1:27054180-27056341 FORWARD LENGTH=1937
AT1G72300.1	| Symbols: | Leucine-rich receptor-like protein kinase family protein | chr1:27217477-27221123 REVERSE LENGTH=3647
AT1G72450.1	| Symbols: JAZ6, TIFY11B | jasmonate-zim-domain protein 6 | chr1:27274065-27276317 REVERSE LENGTH=1262
AT1G72810.1	| Symbols: | Pyridoxal-5'-phosphate-dependent enzyme family protein | chr1:27398591-27400417 REVERSE LENGTH=1744
AT1G73590.1	| Symbols: PIN1, ATPIN1 | Auxin efflux carrier family protein | chr1:27659673-27663178 FORWARD LENGTH=2270
AT1G75450.1	| Symbols: CKX5, ATCKX5, ATCKX6 | cytokinin oxidase 5 | chr1:28314458-28318362 REVERSE LENGTH=2711
AT1G75590.1	| Symbols: | SAUR-like auxin-responsive protein family | chr1:28382896-28383768 REVERSE LENGTH=873
AT1G76080.1	| Symbols: ATCDSP32, CDSP32 | chloroplastic drought-induced stress protein of 32 kD | chr1:28547786-28549419 REVERSE LENGTH=1257
AT1G77640.1	| Symbols: | Integrase-type DNA-binding superfamily protein | chr1:29178737-29179675 FORWARD LENGTH=939
AT1G78240.1	| Symbols: TSD2, QUA2, OSU1 | S-adenosyl-L-methionine-dependent methyltransferases superfamily protein | chr1:29432829-29436484 REVERSE LENGTH=2760
AT1G79700.2	| Symbols: | Integrase-type DNA-binding superfamily protein | chr1:29990336-29993724 REVERSE LENGTH=1112
AT2G01420.2	| Symbols: PIN4 | Auxin efflux carrier family protein | chr2:180105-183328 REVERSE LENGTH=2353
AT2G01570.1	| Symbols: RGA1, RGA | GRAS family transcription factor family protein | chr2:255249-257550 REVERSE LENGTH=2302
AT2G01670.1	| Symbols: atnudt17, NUDT17 | nudix hydrolase homolog 17 | chr2:296510-298101 REVERSE LENGTH=1211
AT2G02950.1	| Symbols: PKS1 | phytochrome kinase substrate 1 | chr2:854947-856538 REVERSE LENGTH=1592
AT2G17820.1	| Symbols: ATHK1, AHK1, HK1 | histidine kinase 1 | chr2:7742924-7748220 REVERSE LENGTH=4040
AT2G18300.3	| Symbols: | basic helix-loop-helix (bHLH) DNA-binding superfamily protein | chr2:7952442-7954739 REVERSE LENGTH=1492
AT2G18700.1	| Symbols: ATTPS11, TPS11, ATTPSB | trehalose phosphatase/synthase 11 | chr2:8109043-8112010 FORWARD LENGTH=2800
AT2G20190.1	| Symbols: ATCLASP, CLASP | CLIP-associated protein | chr2:8711596-8719018 REVERSE LENGTH=4791
AT2G21210.1	| Symbols: | SAUR-like auxin-responsive protein family | chr2:9085210-9085909 REVERSE LENGTH=700
AT2G22125.1	| Symbols: CSI1 | binding | chr2:9406263-9414518 FORWARD LENGTH=6941
AT2G23600.1	| Symbols: ACL, ATMES2, MES2, ATME8, ME8 | acetone-cyanohydrin lyase | chr2:10042199-10043673 REVERSE LENGTH=950
AT2G23760.1	| Symbols: BLH4, SAW2 | BEL1-like homeodomain 4 | chr2:10107709-10112823 REVERSE LENGTH=2213
AT2G23790.1	| Symbols: | Protein of unknown function (DUF607) | chr2:10125368-10127521 REVERSE LENGTH=1401
AT2G26560.1	| Symbols: PLP2, PLA IIA, PLA2A | phospholipase A 2A | chr2:11293769-11295806 REVERSE LENGTH=1465
AT2G27500.1	| Symbols: | Glycosyl hydrolase superfamily protein | chr2:11752170-11754028 REVERSE LENGTH=1557
AT2G28056.1	| Symbols: MIR172A, MIR172 | MIR172/MIR172A; miRNA | chr2:11941661-11943604 REVERSE LENGTH=1102
AT2G28080.1	| Symbols: | UDP-Glycosyltransferase superfamily protein | chr2:11960571-11963293 REVERSE LENGTH=1718
AT2G28200.1	| Symbols: | C2H2-type zinc finger family protein | chr2:12024149-12025306 FORWARD LENGTH=1158
AT2G28400.1	| Symbols: | Protein of unknown function, DUF584 | chr2:12148304-12149052 REVERSE LENGTH=749
AT2G28510.1	| Symbols: | Dof-type zinc finger DNA-binding family protein | chr2:12199098-12200765 REVERSE LENGTH=1290
AT2G30520.1	| Symbols: RPT2 | Phototropic-responsive NPH3 family protein | chr2:13002742-13005600 REVERSE LENGTH=1987
AT2G30600.5	| Symbols: | BTB/POZ domain-containing protein | chr2:13036876-13041684 FORWARD LENGTH=3134
AT2G30990.1	| Symbols: | Protein of unknown function (DUF688) | chr2:13187583-13190283 REVERSE LENGTH=2103
AT2G31070.1	| Symbols: TCP10 | TCP domain protein 10 | chr2:13220478-13222609 REVERSE LENGTH=2017
AT2G33170.1	| Symbols: | Leucine-rich repeat receptor-like protein kinase family protein | chr2:14056250-14060641 REVERSE LENGTH=4012
AT2G33310.2	| Symbols: IAA13 | auxin-induced protein 13 | chr2:14114281-14115969 REVERSE LENGTH=1244
AT2G34510.1	| Symbols: | Protein of unknown function, DUF642 | chr2:14543997-14546879 REVERSE LENGTH=1470
AT2G34650.1	| Symbols: PID, ABR | Protein kinase superfamily protein | chr2:14589760-14591788 REVERSE LENGTH=1722
AT2G34710.1	| Symbols: PHB, ATHB14, ATHB-14, PHB-1D | Homeobox-leucine zipper family protein / lipid-binding START domain-containing protein | chr2:14639323-14644273 REVERSE LENGTH=3064
AT2G37460.1	| Symbols: | nodulin MtN21 /EamA-like transporter family protein | chr2:15726448-15729098 REVERSE LENGTH=1450
AT2G38120.1	| Symbols: AUX1, WAV5, PIR1, MAP1 | Transmembrane amino acid transporter family protein | chr2:15972993-15977180 FORWARD LENGTH=2135
AT2G38170.3	| Symbols: CAX1, ATCAX1, RCI4 | cation exchanger 1 | chr2:15990045-15993278 REVERSE LENGTH=1596
AT2G38310.1	| Symbols: PYL4, RCAR10 | PYR1-like 4 | chr2:16050063-16051168 FORWARD LENGTH=1106
AT2G39360.1	| Symbols: | Protein kinase superfamily protein | chr2:16437472-16440154 REVERSE LENGTH=2683
AT2G40000.1	| Symbols: HSPRO2, ATHSPRO2 | ortholog of sugar beet HS1 PRO-1 2 | chr2:16700510-16702028 REVERSE LENGTH=1519
AT2G40270.1	| Symbols: | Protein kinase family protein | chr2:16821934-16824506 REVERSE LENGTH=1851
AT2G41710.3	| Symbols: | Integrase-type DNA-binding superfamily protein | chr2:17400022-17403050 REVERSE LENGTH=1776
AT2G41890.1	| Symbols: | curculin-like (mannose-binding) lectin family protein / PAN domain-containing protein | chr2:17478058-17480352 REVERSE LENGTH=2295
AT2G42280.1	| Symbols: | basic helix-loop-helix (bHLH) DNA-binding superfamily protein | chr2:17611185-17613519 REVERSE LENGTH=1679
AT2G42690.1	| Symbols: | alpha/beta-Hydrolases superfamily protein | chr2:17776241-17777717 REVERSE LENGTH=1389
AT2G42870.1	| Symbols: PAR1, HLH1 | phy rapidly regulated 1 | chr2:17836416-17837250 REVERSE LENGTH=835
AT2G43820.1	| Symbols: GT, UGT74F2, ATSAGT1, SGT1, SAGT1 | UDP-glucosyltransferase 74F2 | chr2:18152227-18153908 FORWARD LENGTH=1595
AT3G01970.1	| Symbols: WRKY45, ATWRKY45 | WRKY DNA-binding protein 45 | chr3:326397-327412 REVERSE LENGTH=914
AT3G02140.1	| Symbols: TMAC2, AFP4 | AFP2 (ABI five-binding protein 2) family protein | chr3:385317-386538 REVERSE LENGTH=1222
AT3G02170.1	| Symbols: LNG2 | longifolia2 | chr3:396012-399779 REVERSE LENGTH=3300
AT3G04070.1	| Symbols: anac047, NAC047 | NAC domain containing protein 47 | chr3:1061526-1063103 REVERSE LENGTH=1254
AT3G04210.1	| Symbols: | Disease resistance protein (TIR-NBS class) | chr3:1105963-1108069 REVERSE LENGTH=1940
AT3G05120.1	| Symbols: ATGID1A, GID1A | alpha/beta-Hydrolases superfamily protein | chr3:1430471-1432778 FORWARD LENGTH=1740
AT3G05900.1	| Symbols: | neurofilament protein-related | chr3:1761205-1763984 REVERSE LENGTH=2355
AT3G06070.1	| Symbols: | unknown protein; BEST Arabidopsis thaliana protein match is: unknown protein (TAIR:AT5G19190.1); Has 33 Blast hits to 33 proteins in 12 species: Archae - 0; Bacteria - 0; Metazoa - 1; Fungi - 0; Plants - 32; Viruses - 0; Other Eukaryotes - 0 (source: NCBI BLink). | chr3:1831057-1831923 REVERSE LENGTH=781
AT3G06080.2	| Symbols: | Plant protein of unknown function (DUF828) | chr3:1834707-1837984 REVERSE LENGTH=2122
AT3G06750.1	| Symbols: | hydroxyproline-rich glycoprotein family protein | chr3:2129623-2130315 REVERSE LENGTH=693
AT3G07010.1	| Symbols: | Pectin lyase-like superfamily protein | chr3:2212728-2216483 REVERSE LENGTH=1673
AT3G12920.1	| Symbols: | SBP (S-ribonuclease binding protein) family protein | chr3:4121883-4123508 REVERSE LENGTH=1437
AT3G13110.1	| Symbols: ATSERAT2;2, SAT-1, SAT-A, SAT3, SAT-M, SERAT2;2 | serine acetyltransferase 2;2 | chr3:4214617-4216302 REVERSE LENGTH=1686
AT3G13750.1	| Symbols: BGAL1 | beta galactosidase 1 | chr3:4510965-4516298 FORWARD LENGTH=3313
AT3G14310.1	| Symbols: ATPME3, PME3 | pectin methylesterase 3 | chr3:4771902-4775119 REVERSE LENGTH=2115
AT3G14370.1	| Symbols: WAG2 | Protein kinase superfamily protein | chr3:4797845-4799504 REVERSE LENGTH=1660
AT3G15570.1	| Symbols: | Phototropic-responsive NPH3 family protein | chr3:5269849-5271922 REVERSE LENGTH=1999
AT3G19380.1	| Symbols: PUB25 | plant U-box 25 | chr3:6714392-6716099 REVERSE LENGTH=1708
AT3G19930.1	| Symbols: STP4, ATSTP4 | sugar transporter 4 | chr3:6934773-6937120 FORWARD LENGTH=2099
AT3G23030.1	| Symbols: IAA2 | indole-3-acetic acid inducible 2 | chr3:8180768-8181800 REVERSE LENGTH=941
AT3G23820.1	| Symbols: GAE6 | UDP-D-glucuronate 4-epimerase 6 | chr3:8603444-8605462 FORWARD LENGTH=2019
AT3G27390.1	| Symbols: | unknown protein; FUNCTIONS IN: molecular_function unknown; INVOLVED IN: biological_process unknown; LOCATED IN: plasma membrane; EXPRESSED IN: 23 plant structures; EXPRESSED DURING: 13 growth stages; BEST Arabidopsis thaliana protein match is: unknown protein (TAIR:AT5G40640.1); Has 101 Blast hits to 99 proteins in 12 species: Archae - 0; Bacteria - 0; Metazoa - 0; Fungi - 0; Plants …
AT3G28860.1	| Symbols: ATMDR1, ATMDR11, PGP19, MDR11, MDR1, ATPGP19, ABCB19, ATABCB19 | ATP binding cassette subfamily B19 | chr3:10870038-10877506 REVERSE LENGTH=4228
AT3G29240.1	| Symbols: | Protein of unknown function (DUF179) | chr3:11191491-11192986 FORWARD LENGTH=1233
AT3G49220.1	| Symbols: | Plant invertase/pectin methylesterase inhibitor superfamily | chr3:18249776-18253839 FORWARD LENGTH=2053
AT3G49970.1	| Symbols: | Phototropic-responsive NPH3 family protein | chr3:18527216-18529066 REVERSE LENGTH=1581
AT3G54400.1	| Symbols: | Eukaryotic aspartyl protease family protein | chr3:20140058-20142642 REVERSE LENGTH=1554
AT3G56050.1	| Symbols: | Protein kinase family protein | chr3:20797955-20800943 REVERSE LENGTH=2104
AT3G61460.1	| Symbols: BRH1 | brassinosteroid-responsive RING-H2 | chr3:22741511-22742284 REVERSE LENGTH=774
AT4G02050.1	| Symbols: STP7 | sugar transporter protein 7 | chr4:898307-900870 REVERSE LENGTH=1819
AT4G03390.1	| Symbols: SRF3 | STRUBBELIG-receptor family 3 | chr4:1490465-1495103 REVERSE LENGTH=3250
AT4G03400.1	| Symbols: DFL2, GH3-10 | Auxin-responsive GH3 family protein | chr4:1497536-1499865 REVERSE LENGTH=2051
AT4G12420.1	| Symbols: SKU5 | Cupredoxin superfamily protein | chr4:7349662-7353074 REVERSE LENGTH=2249
AT4G14680.1	| Symbols: APS3 | Pseudouridine synthase/archaeosine transglycosylase-like family protein | chr4:8413288-8415391 REVERSE LENGTH=1633
AT4G15080.1	| Symbols: | DHHC-type zinc finger family protein | chr4:8608700-8612693 REVERSE LENGTH=2893
AT4G16370.1	| Symbols: ATOPT3, OPT3 | oligopeptide transporter | chr4:9247302-9250091 REVERSE LENGTH=2446
AT4G16980.1	| Symbols: | arabinogalactan-protein family | chr4:9556978-9557812 FORWARD LENGTH=835
AT4G18010.1	| Symbols: IP5PII, AT5PTASE2, 5PTASE2 | myo-inositol polyphosphate 5-phosphatase 2 | chr4:9991012-9994420 REVERSE LENGTH=2444
AT4G18340.1	| Symbols: | Glycosyl hydrolase superfamily protein | chr4:10130050-10132061 REVERSE LENGTH=1431
AT4G18700.1	| Symbols: CIPK12, SnRK3.9, ATWL4, WL4 | CBL-interacting protein kinase 12 | chr4:10288798-10290850 REVERSE LENGTH=2053
AT4G19420.1	| Symbols: | Pectinacetylesterase family protein | chr4:10587166-10590588 REVERSE LENGTH=1832
AT4G22190.1	| Symbols: | unknown protein; Has 283 Blast hits to 154 proteins in 44 species: Archae - 0; Bacteria - 2; Metazoa - 24; Fungi - 12; Plants - 48; Viruses - 0; Other Eukaryotes - 197 (source: NCBI BLink). | chr4:11741855-11743318 REVERSE LENGTH=1464
AT4G24230.6	| Symbols: ACBP3 | acyl-CoA-binding domain 3 | chr4:12566935-12568754 REVERSE LENGTH=1288
AT4G24660.1	| Symbols: ATHB22, MEE68, HB22, ZHD2 | homeobox protein 22 | chr4:12724743-12725637 REVERSE LENGTH=895
AT4G26540.1	| Symbols: | Leucine-rich repeat receptor-like protein kinase family protein | chr4:13394522-13398112 REVERSE LENGTH=3511
AT4G27260.1	| Symbols: GH3.5, WES1 | Auxin-responsive GH3 family protein | chr4:13653609-13656204 FORWARD LENGTH=2246
AT4G31877.1	| Symbols: MIR156C | MIR156C; miRNA | chr4:15413319-15415873 REVERSE LENGTH=857
AT4G34220.1	| Symbols: | Leucine-rich repeat protein kinase family protein | chr4:16381506-16384194 REVERSE LENGTH=2561
AT4G34870.1	| Symbols: ROC5, ATCYP1 | rotamase cyclophilin 5 | chr4:16614327-16615313 FORWARD LENGTH=987
AT4G35240.1	| Symbols: | Protein of unknown function (DUF630 and DUF632) | chr4:16760949-16767087 REVERSE LENGTH=3219
AT4G37590.1	| Symbols: NPY5 | Phototropic-responsive NPH3 family protein | chr4:17662842-17666428 REVERSE LENGTH=2851
AT5G04530.1	| Symbols: KCS19 | 3-ketoacyl-CoA synthase 19 | chr5:1291822-1293688 REVERSE LENGTH=1867
AT5G05690.1	| Symbols: CPD, CYP90A, CYP90, CBB3, DWF3, CYP90A1 | Cytochrome P450 superfamily protein | chr5:1702688-1706780 REVERSE LENGTH=1713
AT5G08520.1	| Symbols: | Duplicated homeodomain-like superfamily protein | chr5:2755175-2758362 REVERSE LENGTH=1813
AT5G11070.1	| Symbols: | unknown protein; Has 1807 Blast hits to 1807 proteins in 277 species: Archae - 0; Bacteria - 0; Metazoa - 736; Fungi - 347; Plants - 385; Viruses - 0; Other Eukaryotes - 339 (source: NCBI BLink). | chr5:3516217-3516995 REVERSE LENGTH=779
AT5G11090.1	| Symbols: | serine-rich protein-related | chr5:3524680-3525846 FORWARD LENGTH=1167
AT5G12010.1	| Symbols: | unknown protein; INVOLVED IN: response to salt stress; LOCATED IN: chloroplast, plasma membrane, membrane; EXPRESSED IN: 23 plant structures; EXPRESSED DURING: 13 growth stages; BEST Arabidopsis thaliana protein match is: unknown protein (TAIR:AT4G29780.1); Has 1807 Blast hits to 1807 proteins in 277 species: Archae - 0; Bacteria - 0; Metazoa - 736; Fungi - 347; Plants - 385; Viruses…
AT5G12050.1	| Symbols: | unknown protein; BEST Arabidopsis thaliana protein match is: unknown protein (TAIR:AT3G13980.1); Has 1807 Blast hits to 1807 proteins in 277 species: Archae - 0; Bacteria - 0; Metazoa - 736; Fungi - 347; Plants - 385; Viruses - 0; Other Eukaryotes - 339 (source: NCBI BLink). | chr5:3890104-3891513 FORWARD LENGTH=1410
AT5G13180.1	| Symbols: ANAC083, VNI2, NAC083 | NAC domain containing protein 83 | chr5:4196572-4197848 FORWARD LENGTH=1101
AT5G15580.1	| Symbols: LNG1 | longifolia1 | chr5:5068301-5072492 REVERSE LENGTH=3540
AT5G17860.1	| Symbols: CAX7 | calcium exchanger 7 | chr5:5902394-5904380 REVERSE LENGTH=1987
AT5G19120.1	| Symbols: | Eukaryotic aspartyl protease family protein | chr5:6414488-6415907 FORWARD LENGTH=1420
AT5G20110.1	| Symbols: | Dynein light chain type 1 family protein | chr5:6791487-6793346 REVERSE LENGTH=778
AT5G20250.4	| Symbols: DIN10 | Raffinose synthase family protein | chr5:6833659-6836782 FORWARD LENGTH=2753
AT5G25190.1	| Symbols: | Integrase-type DNA-binding superfamily protein | chr5:8706790-8707748 REVERSE LENGTH=856
AT5G25350.1	| Symbols: EBF2 | EIN3-binding F box protein 2 | chr5:8794252-8797020 REVERSE LENGTH=2600
AT5G28300.1	| Symbols: | Duplicated homeodomain-like superfamily protein | chr5:10292651-10295283 REVERSE LENGTH=2180
AT5G28770.2	| Symbols: BZO2H3 | bZIP transcription factor family protein | chr5:10796459-10798222 REVERSE LENGTH=1209
AT5G28840.1	| Symbols: GME | GDP-D-mannose 3',5'-epimerase | chr5:10862173-10864903 REVERSE LENGTH=1612
AT5G40450.1	| Symbols: | unknown protein; FUNCTIONS IN: molecular_function unknown; INVOLVED IN: biological_process unknown; LOCATED IN: chloroplast, plasma membrane; EXPRESSED IN: 24 plant structures; EXPRESSED DURING: 13 growth stages; Has 30201 Blast hits to 17322 proteins in 780 species: Archae - 12; Bacteria - 1396; Metazoa - 17338; Fungi - 3422; Plants - 5037; Viruses - 0; Other Eukaryotes - 2996 (sour…
AT5G40890.1	| Symbols: ATCLC-A, CLC-A, CLCA, ATCLCA | chloride channel A | chr5:16381346-16385319 REVERSE LENGTH=2947
AT5G42750.1	| Symbols: BKI1 | BRI1 kinase inhibitor 1 | chr5:17142820-17144160 REVERSE LENGTH=1341
AT5G43603.1	| Symbols: MIR166F, MIR166 | MIR166/MIR166F; miRNA | chr5:17516308-17516398 FORWARD LENGTH=91
AT5G44260.1	| Symbols: | Zinc finger C-x8-C-x5-C-x3-H type family protein | chr5:17829626-17831225 REVERSE LENGTH=1600
AT5G47370.1	| Symbols: HAT2 | Homeobox-leucine zipper protein 4 (HB-4) / HD-ZIP protein | chr5:19216312-19217909 REVERSE LENGTH=1284
AT5G47560.1	| Symbols: ATTDT, ATSDAT, TDT | tonoplast dicarboxylate transporter | chr5:19287369-19290465 REVERSE LENGTH=2267
AT5G49700.1	| Symbols: | Predicted AT-hook DNA-binding family protein | chr5:20192599-20193429 FORWARD LENGTH=831
AT5G51550.1	| Symbols: EXL3 | EXORDIUM like 3 | chr5:20939494-20940895 REVERSE LENGTH=1402
AT5G52060.1	| Symbols: ATBAG1, BAG1 | BCL-2-associated athanogene 1 | chr5:21152214-21154244 REVERSE LENGTH=1767
AT5G52900.1	| Symbols: | unknown protein; Has 30201 Blast hits to 17322 proteins in 780 species: Archae - 12; Bacteria - 1396; Metazoa - 17338; Fungi - 3422; Plants - 5037; Viruses - 0; Other Eukaryotes - 2996 (source: NCBI BLink). | chr5:21452442-21453808 REVERSE LENGTH=1275
AT5G53210.1	| Symbols: SPCH | basic helix-loop-helix (bHLH) DNA-binding superfamily protein | chr5:21586606-21588941 REVERSE LENGTH=1095
AT5G54250.1	| Symbols: ATCNGC4, CNGC4, HLM1, DND2 | cyclic nucleotide-gated cation channel 4 | chr5:22025553-22030060 REVERSE LENGTH=2305
AT5G54380.1	| Symbols: THE1 | protein kinase family protein | chr5:22077092-22079880 REVERSE LENGTH=2789
AT5G54510.1	| Symbols: GH3.6, DFL1 | Auxin-responsive GH3 family protein | chr5:22131093-22133678 REVERSE LENGTH=2181
AT5G54940.1	| Symbols: | Translation initiation factor SUI1 family protein | chr5:22308271-22309408 REVERSE LENGTH=658
AT5G56250.2	| Symbols: HAP8 | hapless 8 | chr5:22768577-22772892 REVERSE LENGTH=2985
AT5G59780.3	| Symbols: MYB59, ATMYB59-3 | myb domain protein 59 | chr5:24082197-24083424 REVERSE LENGTH=1010
AT5G60450.1	| Symbols: ARF4 | auxin response factor 4 | chr5:24308322-24312698 REVERSE LENGTH=3114
AT5G60970.1	| Symbols: TCP5 | TEOSINTE BRANCHED 1, cycloidea and PCF transcription factor 5 | chr5:24535570-24537047 REVERSE LENGTH=1248
AT5G61420.2	| Symbols: MYB28, HAG1 | myb domain protein 28 | chr5:24689151-24690797 REVERSE LENGTH=1427
AT5G61480.1	| Symbols: PXY | Leucine-rich repeat protein kinase family protein | chr5:24724541-24727842 REVERSE LENGTH=3126
AT5G61590.1	| Symbols: | Integrase-type DNA-binding superfamily protein | chr5:24764438-24765324 REVERSE LENGTH=887
AT5G61960.1	| Symbols: AML1, ML1 | MEI2-like protein 1 | chr5:24878521-24884720 REVERSE LENGTH=3886
AT5G62680.1	| Symbols: | Major facilitator superfamily protein | chr5:25165137-25167943 REVERSE LENGTH=2265
AT5G62940.1	| Symbols: HCA2, DOF5.6 | Dof-type zinc finger DNA-binding family protein | chr5:25256919-25258681 REVERSE LENGTH=1560
AT5G63160.1	| Symbols: BT1 | BTB and TAZ domain protein 1 | chr5:25333263-25335485 REVERSE LENGTH=1406
AT5G63410.1	| Symbols: | Leucine-rich repeat protein kinase family protein | chr5:25394984-25398153 REVERSE LENGTH=2492
AT5G64570.1	| Symbols: XYL4, ATBXL4 | beta-D-xylosidase 4 | chr5:25810115-25813335 REVERSE LENGTH=2493
AT5G67190.1	| Symbols: DEAR2 | DREB and EAR motif protein 2 | chr5:26809135-26809689 REVERSE LENGTH=555
AT5G67300.1	| Symbols: ATMYBR1, ATMYB44, MYBR1, MYB44 | myb domain protein r1 | chr5:26854022-26856006 FORWARD LENGTH=1985
AT5G67440.1	| Symbols: NPY3 | Phototropic-responsive NPH3 family protein | chr5:26912707-26916294 REVERSE LENGTH=2584
